# Supplementary material for: IL-23p19 and CD5 antigen-like form a possible novel heterodimeric cytokine and contribute to experimental autoimmune encephalomyelitis development
Source: PubMed Central journal article supplement (PMC7933155; doi:10.1038/s41598-021-84624-9), 2021-03-04
Supplement: 41598_2021_84624_MOESM1_ESM.pdf [file 41598_2021_84624_MOESM1_ESM.pdf]

## **Supplementary information**

### **IL-23p19 and CD5 antigen-like form a possible novel heterodimeric cytokine and contribute to experimental autoimmune encephalomyelitis development**

Hideaki Hasegawa<sup>1</sup>, Izuru Mizoguchi<sup>1</sup>, Naoko Orii<sup>1</sup>, Shinya Inoue<sup>1</sup>, Yasuhiro Katahira<sup>1</sup>,  
Toshihiko Yoneteo<sup>1</sup>, Mingli Xu<sup>1</sup>, Toru Miyazaki<sup>2</sup>, and Takayuki Yoshimoto<sup>1\*</sup>

<sup>1</sup>Department of Immunoregulation, Institute of Medical Science, Tokyo Medical University, 6-1-1 Shinjuku, Shinjuku-ku, Tokyo 160-8402, Japan

<sup>2</sup>Laboratory of Molecular Biomedicine for Pathogenesis, Center for Disease Biology and Integrative Medicine, Faculty of Medicine, The University of Tokyo, 7-3-1 Hongo, Bunkyo-ku, Tokyo 113-0033, Japan

\*Correspondence should be addressed to Takayuki Yoshimoto, Department of Immunoregulation, Institute of Medical Science, Tokyo Medical University, 6-1-1 Shinjuku, Shinjuku-ku, Tokyo 160-8402, Japan. E-mail: yoshimot@tokyo-med.ac.jp

## Supplementary Methods

**Human naive CD4<sup>+</sup> T cell preparation.** Fresh human peripheral blood was collected from healthy volunteers and mononuclear cells were immediately purified by using Lympholyte-H (Cedarlane) density gradient centrifugation. Naive CD4<sup>+</sup> T cells were further purified from peripheral blood mononuclear cells by negative selection using the naive CD4<sup>+</sup> T cell isolation kit and AutoMACS Pro (Miltenyi Biotec). The purity was analyzed by flow cytometry and routinely more than 95%. This study was approved by the institutional review board of Tokyo Medical University (no. 3339). Written informed consent was obtained from all participants in accordance with the Declaration of Helsinki.

**Th differentiation assay.** Human naive CD4<sup>+</sup> T cells were stimulated with anti-CD3 and anti-CD28 using Dynabeads Human T-Activator CD3/CD28 (ThermoFisher) under Th1-polarizing conditions with human IL-12 (kindly provided from Dr. Gately, 10 ng/ml) and anti-human IL-4 (MP4-25D2, BioLegend, 10 µg/ml), Th2-polarizing conditions with human IL-4 (BioLegend, 20 ng/ml) and anti-human IFN-γ (AF-285-NA, R&D, 5 µg/ml), and Th17-polarizing conditions with human IL-1β (Peprotech, 10 ng/ml), human IL-6 (BioLegend, 20 ng/ml), human IL-23 (eBioscience, 10 ng/ml), anti-human IFN-γ, anti-human IL-4, and Th conditions without any addition of cytokine and antibody.

**Flow cytometry.** For intracellular human cytokine staining, single-cell suspensions were restimulated for 4 h with 50 ng/ml PMA and 500 ng/ml ionomycin in the presence of 5 µg/ml brefeldin A. Cells were stained with FICT-conjugated anti-human CD4 (OKT4, BioLegend), fixed with Fixation Buffer (eBioscience) for 15 min, and permeabilized with Permeabilization Buffer (eBioscience) for 30 min. These cells were then stained intracellularly with PE-conjugated anti-human p19 (727753, R&D), APC-conjugated anti-human CD5L (CD5L/2951, Novusbio), Pacific blue-conjugated anti-human GM-

CSF (BVD2-21C11, BioLegend), and PE-Cy7-conjugated anti-human IL-17A (eBio64DE17, eBioscience).

**Supplementary Table 1.** Comparison of EAE susceptibility between control p19<sup>flox/flox</sup> mice and CD4<sup>+</sup> T-cell-specific conditional p19-deficient (CD4-Cre/p19<sup>flox/flox</sup>) mice.

| Mice                             | Incidence Rate | Day of Onset     | Maximum Score   |
|----------------------------------|----------------|------------------|-----------------|
| p19 <sup>flox/flox</sup>         | 7 / 7          | 15.3 ± 3.5       | 3.0 ± 0.9       |
| CD4-Cre/p19 <sup>flox/flox</sup> | 6 / 7          | 18.6 ± 4.6       | 1.3 ± 0.7       |
| <i>P</i> value                   |                | <i>P</i> = 0.259 | <i>P</i> < 0.05 |

**Supplementary Table 2.** Comparison of EAE susceptibility between control WT mice and CD5L-deficient mice.

| Mice           | Incidence Rate | Day of Onset     | Maximum Score    |
|----------------|----------------|------------------|------------------|
| WT             | 6 / 6          | 9.8 ± 2.3        | 3.2 ± 0.4        |
| CD5L-deficient | 5 / 6          | 14.6 ± 4.3       | 1.0 ± 0.6        |
| <i>P</i> value |                | <i>P</i> = 0.061 | <i>P</i> < 0.001 |

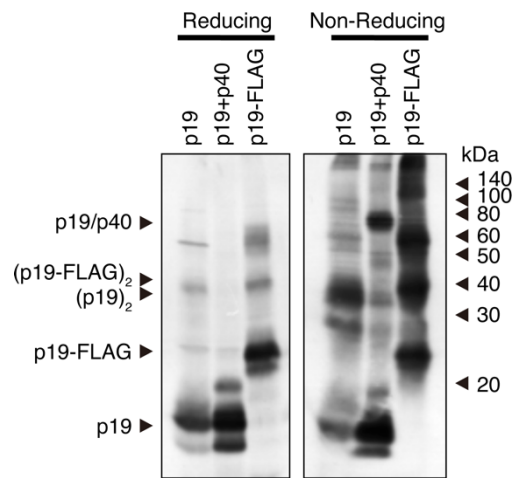

**Supplementary Figure 1.** Possible formation of a p19 homodimer in the culture supernatants of cells overexpressed with the p19 expression vector. HEK293T cells were transfected with expression vectors of p3×FLAG-CMV-14-p19 without a FLAG tag or p3×FLAG-CMV-14-p19 alone and cotransfected with expression vectors of p3×FLAG-CMV-14-p19 without a FLAG tag or p3×FLAG-CMV-14-p40 without a FLAG tag. After 3 days, the culture supernatants were subjected to western blotting using anti-p19 under reducing and nonreducing conditions. Data are representative of two independent experiments.

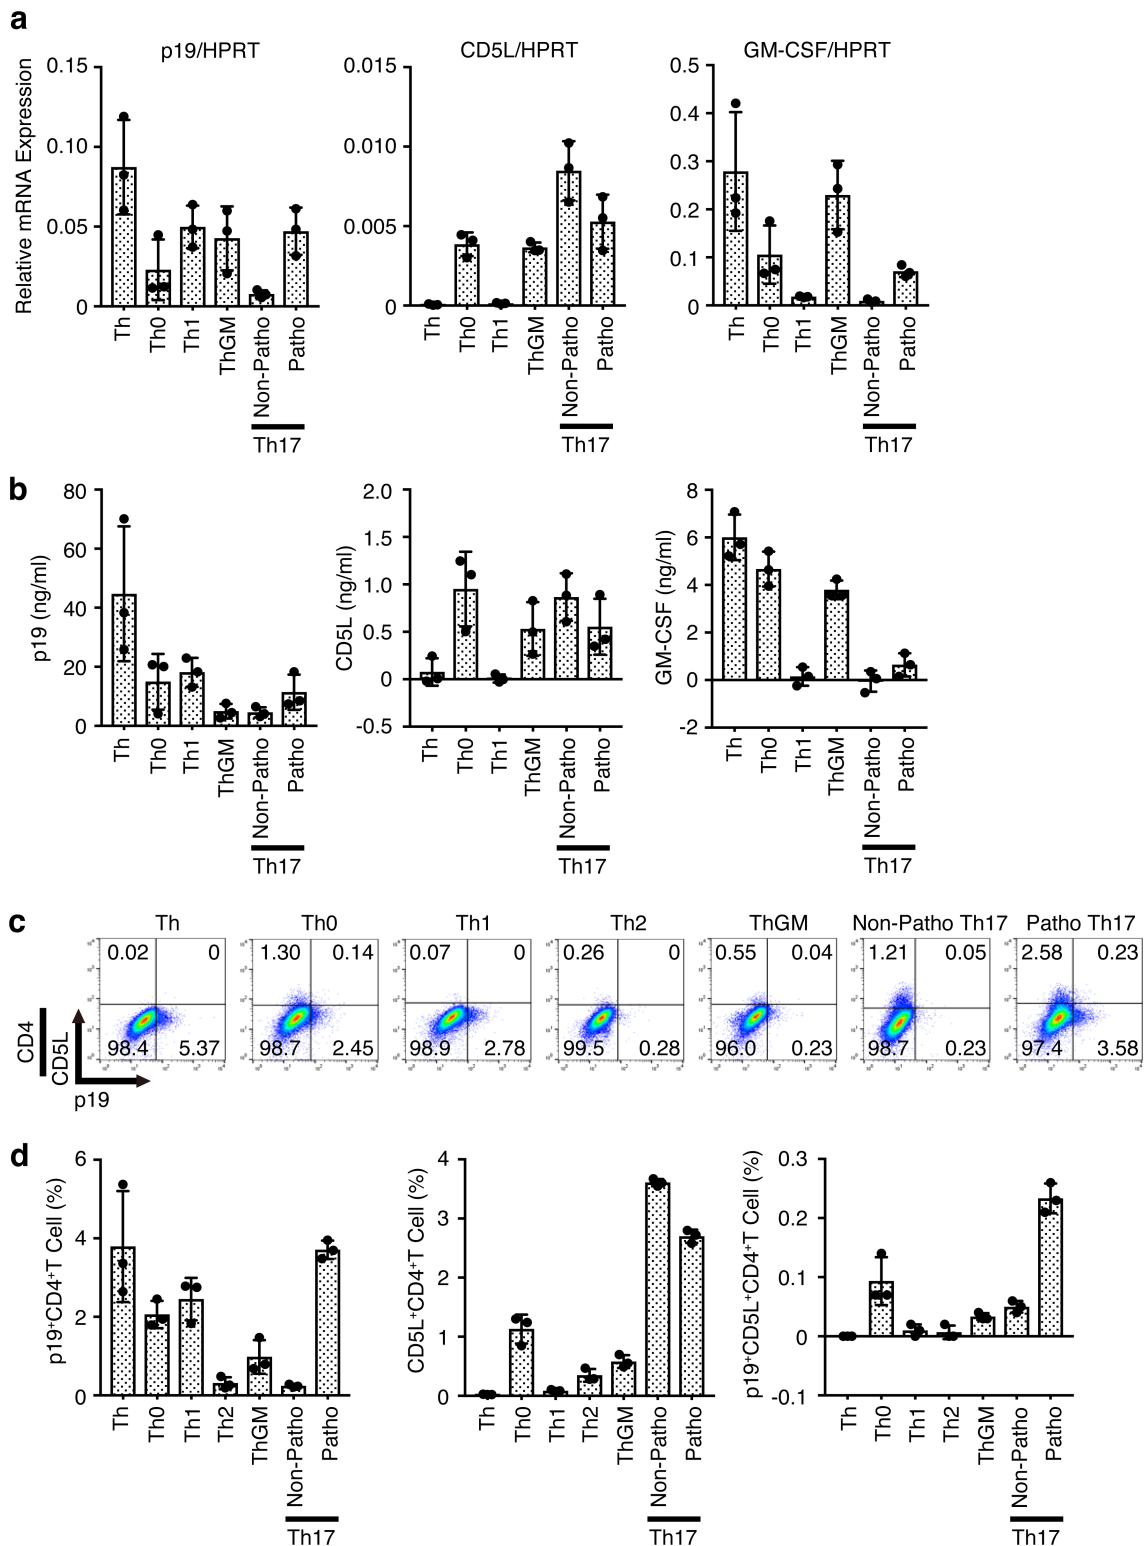

**Supplementary Figure 2.** Correlation of p19, CD5L, p19/CD5L, and GM-CSF under various Th-polarizing conditions. **a, b** Naive CD4<sup>+</sup> T cells from WT mice were stimulated with plate-coated anti-CD3 (2  $\mu$ g/ml) and anti-CD28 (1  $\mu$ g/ml) for 2 days under various Th-polarizing conditions; Th, Th0, Th1, ThGM, non-pathogenic Th17, and pathogenic

Th17. Total RNA was extracted and subjected to quantitative RT-PCR analysis (**a**). After 3 days later, culture supernatants were collected and analyzed for protein expression of p19 and CD5L by ELISA (**b**). Note that a recombinant single-chain IL-23 (10 ng/ml), which can be detected by p19-specific ELISA, was included in the culture medium under pathogenic Th17-polarizing conditions. **c, d** Naive CD4<sup>+</sup> T cells were also stimulated with plate-coated anti-CD3 (5 µg/ml) and anti-CD28 (2 µg/ml) under various Th-polarizing conditions for 2 days, then intracellularly stained for p19 and CD5L after restimulation with PMA and ionomycin. Representative dot plots were shown (**c**). Data are shown as the mean ± SD (n = 3) and are representative of at least three independent experiments.

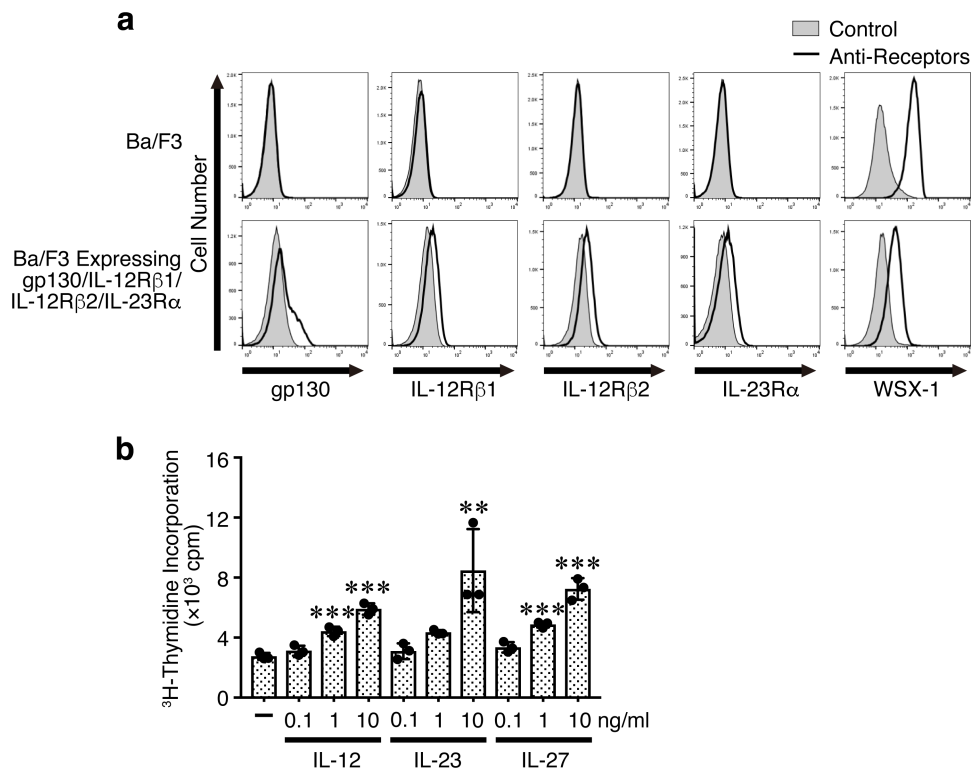

**Supplementary Figure 3.** Characterization of Ba/F3 cells expressing gp130/IL-12Rβ1/IL-12Rβ2/IL-23Rα. Cell surface expressions of gp130, IL-12Rβ1, IL-12Rβ2, IL-23Rα and WSX-1 on parental Ba/F3 and Ba/F3 cells transfected with expression vectors for gp130, IL-12Rβ1, IL-12Rβ2 and IL-23Rα were analyzed via FACS (**a**). Proliferative activity of these cells in response to IL-12, IL-23 and IL-27 was determined (**b**). Data are shown as the mean  $\pm$  SD in triplicate and are representative of three independent experiments. *P* values were determined using one-way ANOVA. \*\**P* < 0.01, \*\*\**P* < 0.001.



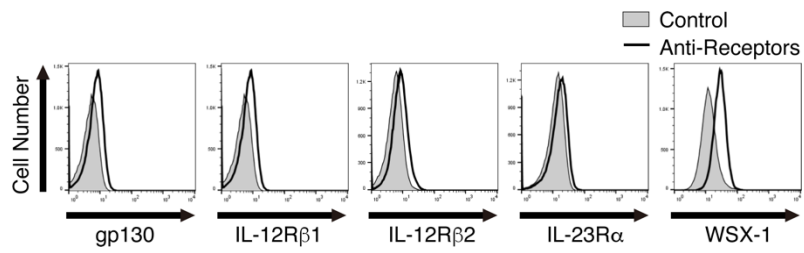

**Supplementary Figure 4.** Cell surface expression of activated CD4<sup>+</sup> T cells. Naive CD4<sup>+</sup> T cells from WT mice were stimulated with plate-coated anti-CD3 (2  $\mu$ g/ml) and anti-CD28 (1  $\mu$ g/ml) under Th conditions for 3 days, and their cell surface expressions of gp130, IL-12R $\beta$ 1, IL-12R $\beta$ 2, IL-23R $\alpha$  and WSX-1 were analyzed via FACS. Data are representative of two independent experiments.

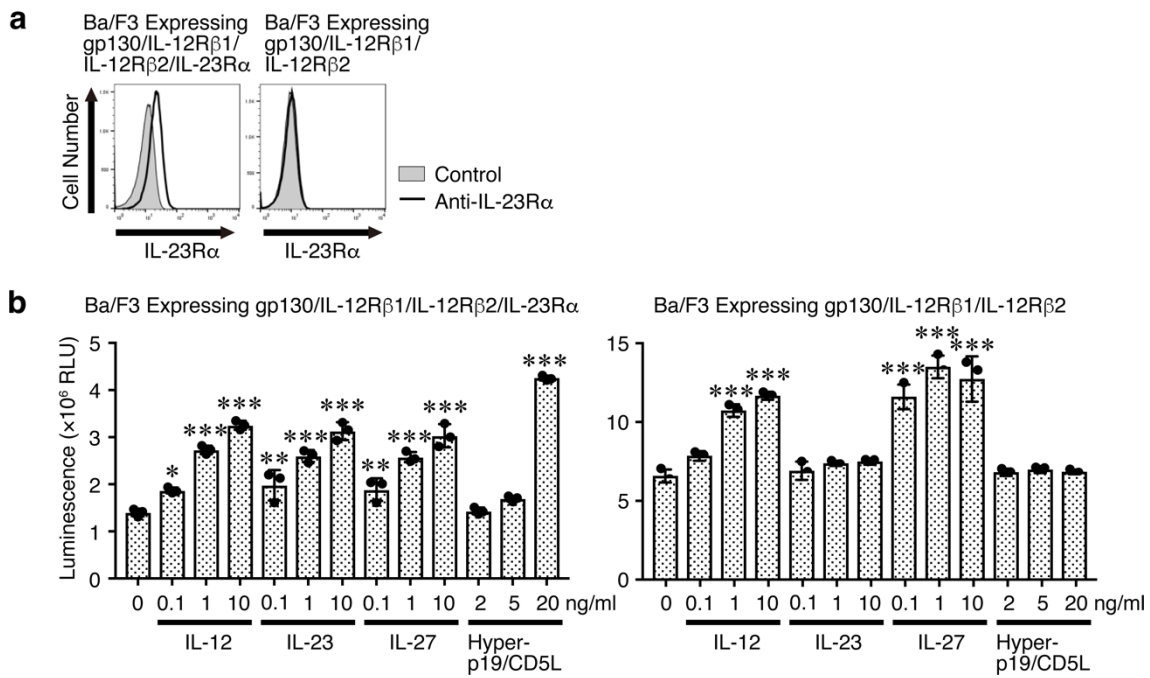

**Supplementary Figure 5.** IL-23R $\alpha$  is possibly one of the receptor subunits for p19/CD5L. Ba/F3 cells ( $1 \times 10^4$  cells/200  $\mu$ l) expressing gp130/IL-12R $\beta$ 1/IL-12R $\beta$ 2/IL-23R $\alpha$  and Ba/F3 cells ( $3 \times 10^3$  cells/200  $\mu$ l) expressing gp130/IL-12R $\beta$ 1/IL-12R $\beta$ 2 were analyzed for their cell surface expression of IL-23R $\alpha$  (**a**) and their proliferative activities in response to IL-12, IL-23, IL-27, and hyper-p19/CD5L were determined after 3 days using CellTiter-Glo 2.0 Viability Assay kit (Promega) (**b**). Data are shown as the mean  $\pm$  SD in triplicate and are representative of three independent experiments. *P* values were determined using one-way ANOVA. \**P* < 0.05, \*\**P* < 0.01, \*\*\**P* < 0.001.

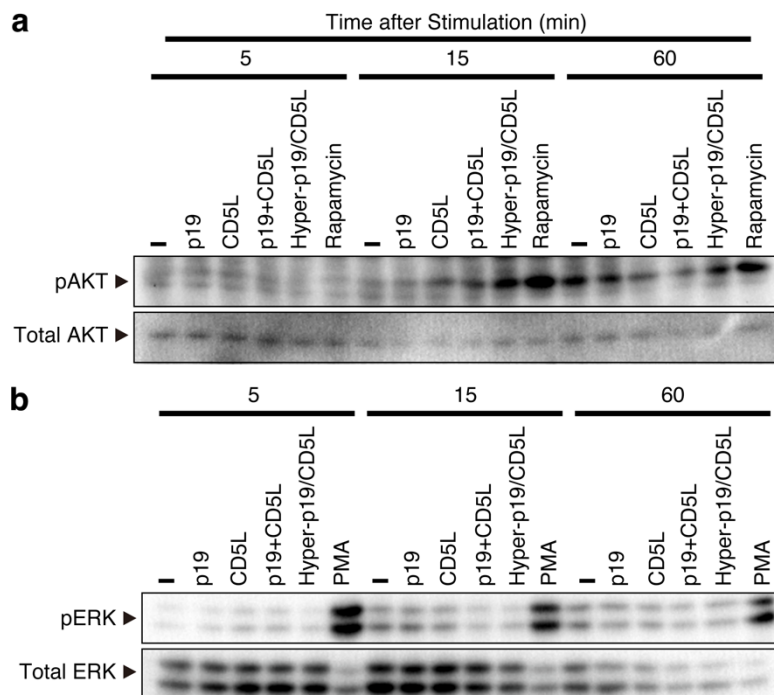

**Supplementary Figure 6.** Hyper-p19/CD5L induced phosphorylation of AKT but not ERK. Ba/F3 cells expressing gp130/IL-12R $\beta$ 1/IL-12R $\beta$ 2/IL-23R $\alpha$  were unstimulated (–) or stimulated with purified recombinant p19, CD5L, a mixture of p19 and CD5L, hyper-p19/CD5L (all 20 ng/ml), and rapamycin (Sigma-Aldrich, positive control for AKT phosphorylation, 5  $\mu$ M) (**a**) or PMA (positive control for ERK phosphorylation, 5  $\mu$ M) (**b**) for 5, 15 and 60 min, then subjected to western blotting with anti-pAKT or anti-pERK and subsequently anti-total AKT or anti-total ERK. Data are representative of two independent experiments.

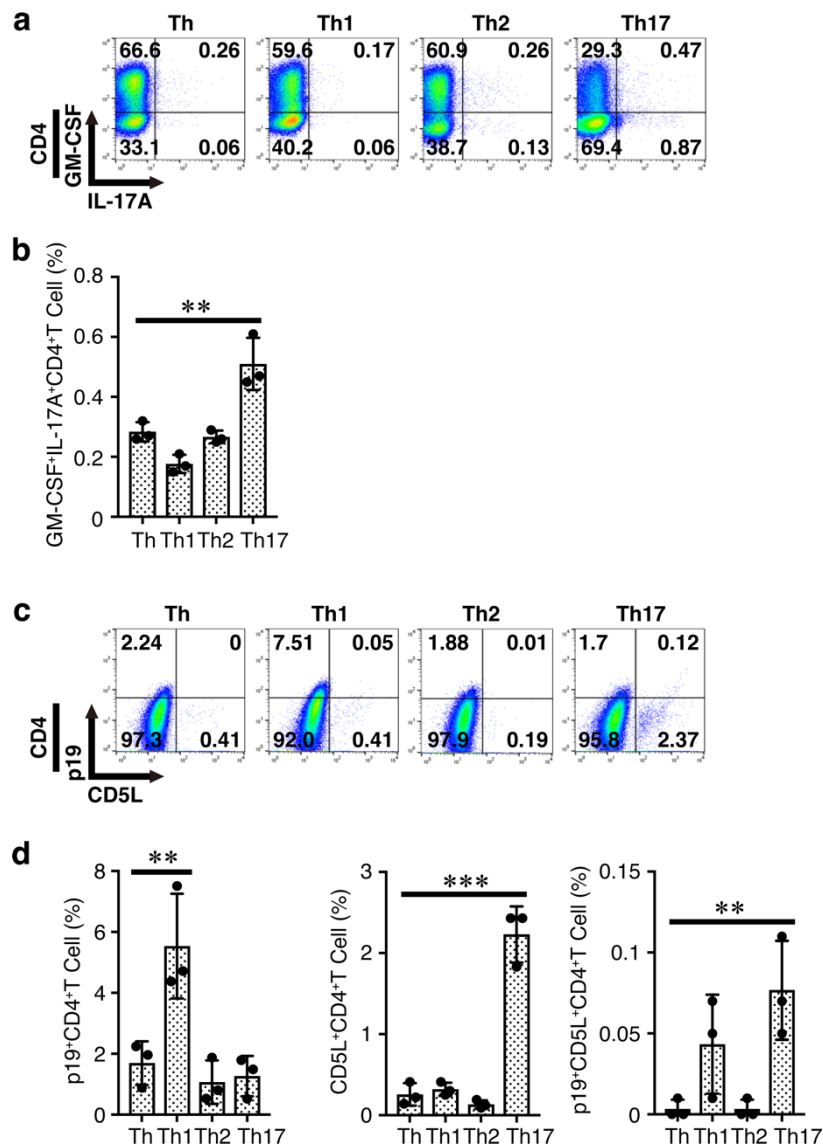

**Supplementary Figure 7.** Higher frequency of p19<sup>+</sup>CD5L<sup>+</sup>CD4<sup>+</sup> T cells in human CD4<sup>+</sup> T cells activated under pathogenic Th17-polarizing conditions and expressing higher frequency of GM-CSF<sup>+</sup>IL-17A<sup>+</sup>CD4<sup>+</sup> T cells. Human peripheral blood-derived naive CD4<sup>+</sup> T cells were stimulated under Th1-, Th2-, and Th17-polarizing conditions together with Th conditions for 6 days with IL-2, and then intracellularly stained for GM-CSF, IL-17A (**a**, **b**), p19, and CD5L (**c**, **d**) after restimulation with PMA and ionomycin. Data are shown as the mean  $\pm$  SD in triplicate and are representative of two independent experiments. *P* values were determined using one-way ANOVA. \*\**P* < 0.01, \*\*\**P* < 0.001.

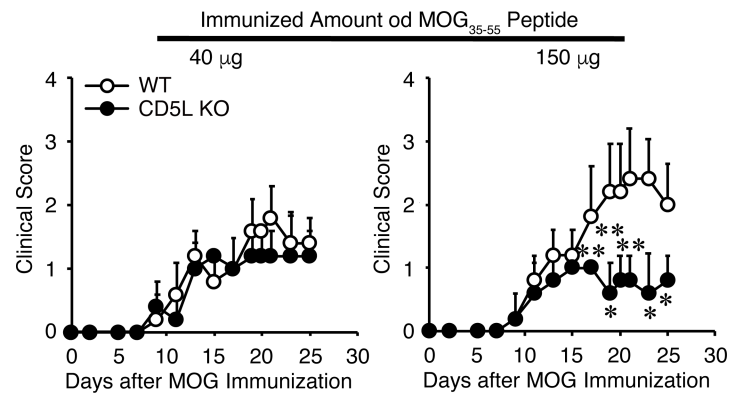

**Supplementary Figure 8.** Effect of dose of MOG<sub>35-55</sub> peptide used for immunization on the susceptibility of WT and CD5L-deficient mice to develop EAE. WT mice or CD5L-deficient mice were immunized with the MOG<sub>35-55</sub> peptide 40 µg or 150 µg, and their clinical scores were monitored over time. Data are shown as the mean ± SD (n = 5) and representative of two independent experiments. *P* values were determined using unpaired two-tailed Student's *t*-tests. \**P* < 0.05.

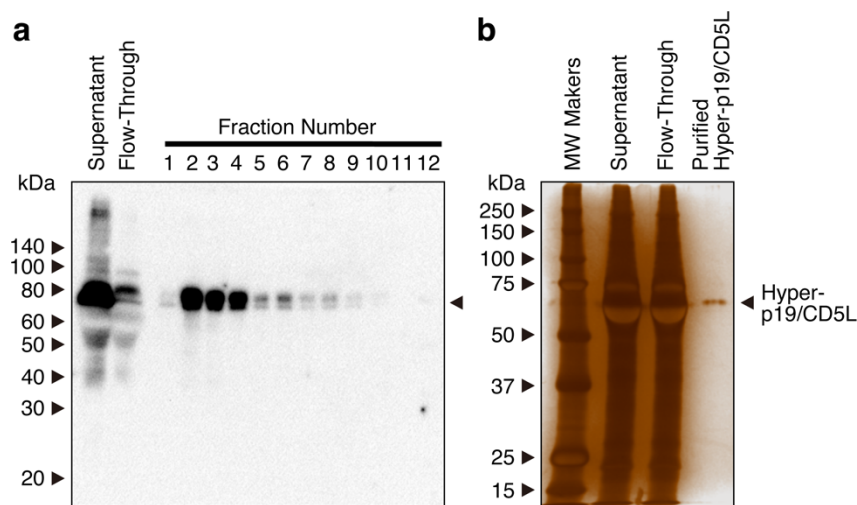

**Supplementary Figure 9.** Characterization of purification procedure by western blotting with anti-CD5L and silver staining of recombinant hyper-p19/CD5L protein. HEK293T cells were transiently transfected with the p3×FLAG-CMV-14-hyper-p19/CD5L expression vector. After 3 days, the culture supernatant was harvested, and hyper-p19/CD5L was purified by affinity chromatography with an anti-p19 affinity column. Each fraction eluted from the affinity column, the culture supernatant before applying the column, and the flow-through were subjected to western blotting analysis with anti-CD5L (Santa Cruz) (**a**). The purity was determined by silver staining following SDS-PAGE and estimated to be >95% via densitometrical analysis using Image Lab software (**b**).

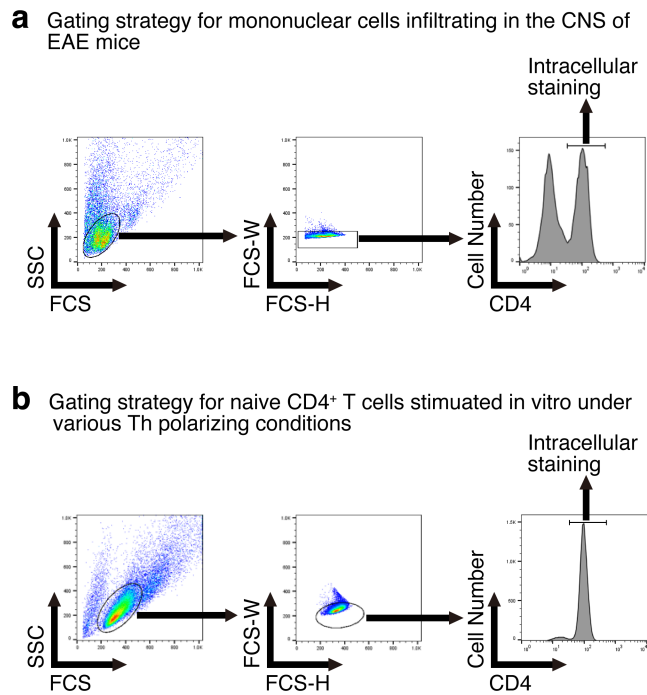

**Supplementary Figure 10.** Gating strategy with flow cytometry. Gating strategy for mononuclear cells infiltrating in the CNS of EAE mice (**a**) and for naive CD4<sup>+</sup> T cells stimulated in vitro under various Th-polarizing conditions (**b**).
